# Supplementary material
Source: HighWire-hosted journal article supplement (https://bmjopengastro.bmj.com/highwire/filestream/1840/field_highwire_adjunct_files/1/bmjgast-2020-000534supp002_data_supplement.pdf)
Supplement: bmjgast-2020-000534supp002_data_supplement.pdf [file bmjgast-2020-000534supp002_data_supplement.pdf]

## **Appendix 1 - Mental Wellbeing of GI Physicians in Southeast Asia**

### **Participant Information**

*Thank you for your participation in this study.*

*Your answers are important to us and it will help us understand how much stress GI physicians are experiencing in Southeast Asia.*

*Before you begin, please note:*

- 1. This is a voluntary survey and you may withdraw from the study at any point.*
- 2. Your responses are anonymized and personally identifiable information will not be collected.*
- 3. By proceeding beyond this page, you give consent to the data being used for research purposes.*
- 4. Please do not complete this survey more than once.*
- 5. This survey is **3 web-pages** long and takes about **9 minutes to complete**. There are about **13 questions** on each page, most questions are **MCQs**.*

### **Consent Form**

*Do you give consent for this data to be used for research?*

*(If you do not consent, please close this webpage. If you change your mind later, you can still click on the link in the invitation email to access this survey again.)*

- Yes, I give consent.
